# Supplementary material for: Comprehensive off-target analysis of dCas9-SAM-mediated HIV reactivation via long noncoding RNA and mRNA profiling
Source: PubMed Central journal article supplement (PMC6131778; doi:10.1186/s12920-018-0394-2), 2018-09-10
Supplement: 12920_2018_394_MOESM2_ESM.pdf [file 12920_2018_394_MOESM2_ESM.pdf]

# Supplementary Figure S1. Distributions of the mapped reads in the genome for the six samples.

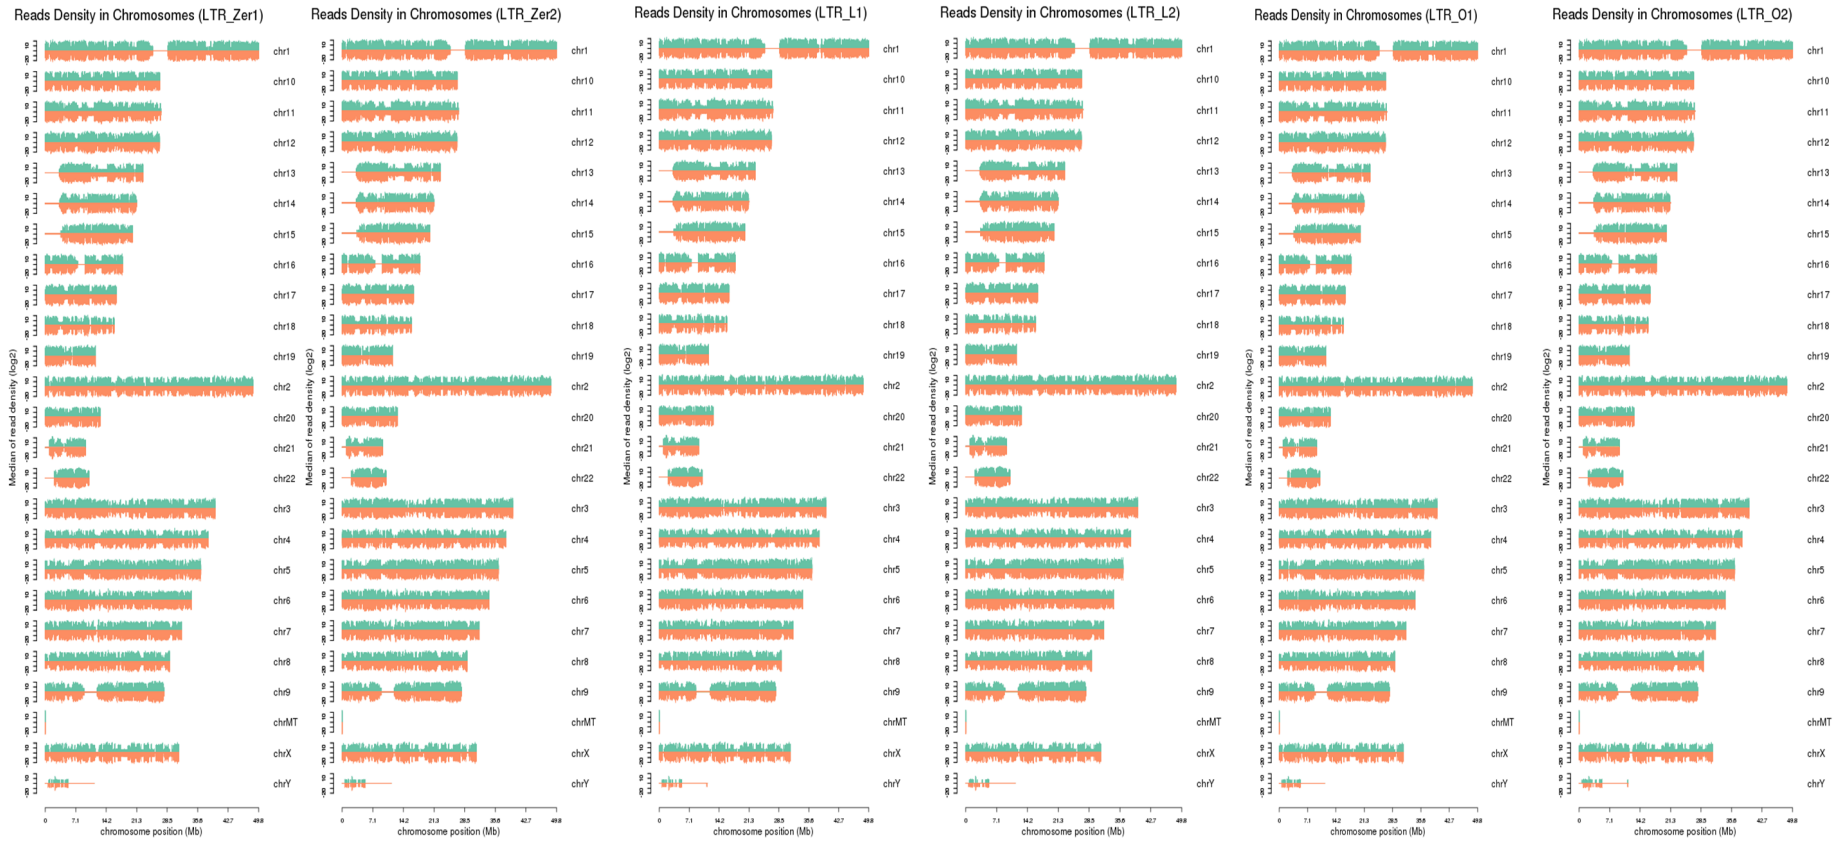

**Supplementary Figure S2.**  
**Workflow charts for RNA-seq analysis.** (a) Library construction. (b) lncRNA filtering by four pipelines to predict candidate lncRNAs based on their structures and noncoding features.

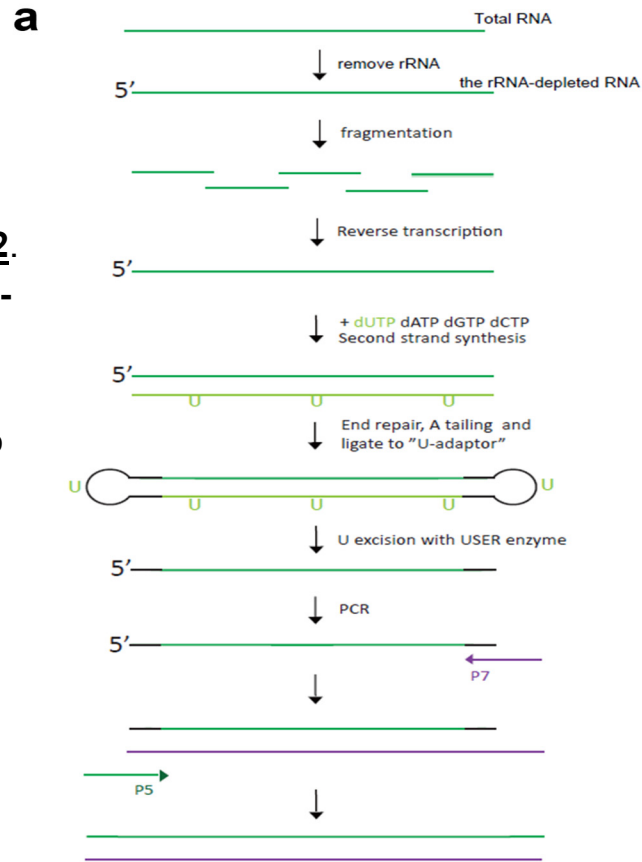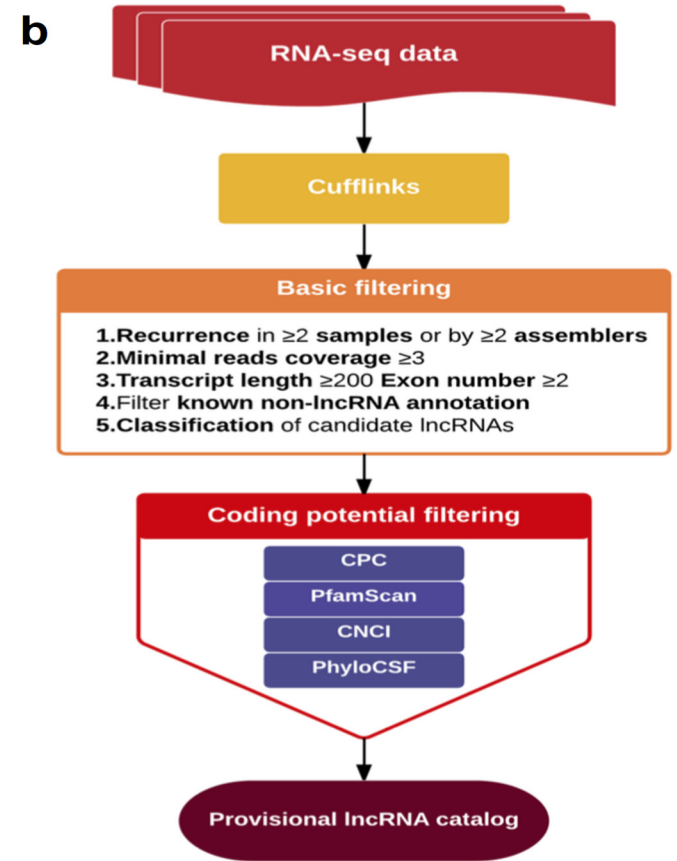

**Supplementary Figure S3.**

Statistics of lncRNA filtering.  
Horizontal axis represents the filtering step and vertical axis represents the number of remaining transcripts after the filtering step.

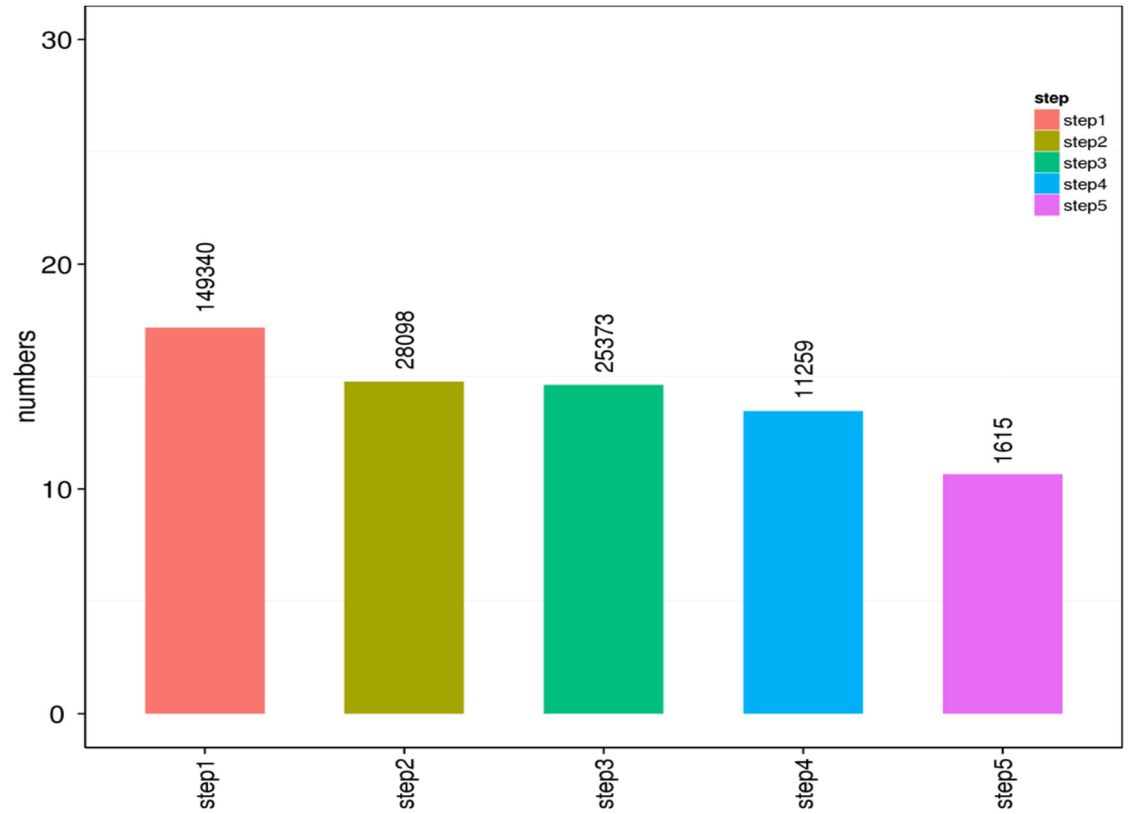

**Supplementary Figure S4.**  
 Illustration of 12 types of alternative splicing events analyzed by ASprofile (Picture taken from Florea L, Song L, Salzberg SL: Thousands of exon skipping events differentiate among splicing patterns in sixteen human tissues. *F1000Res* 2013, **2**:188)

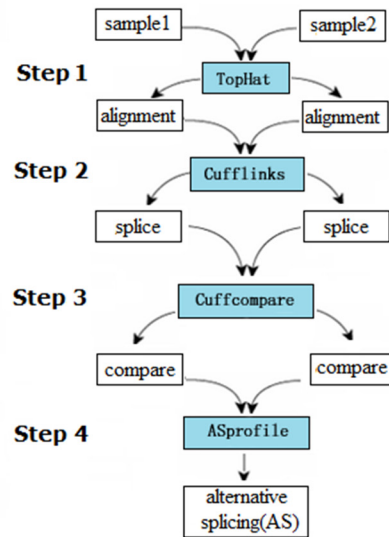

**AS analysis workflow**

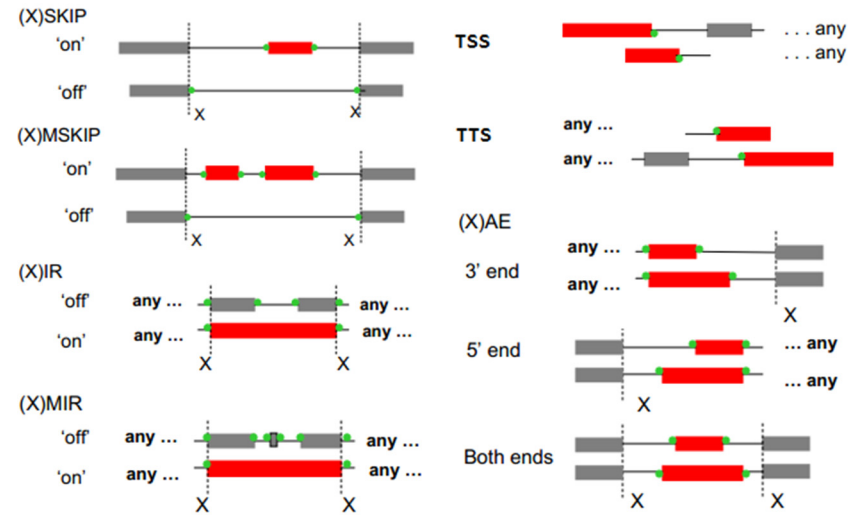

**AS events**

**The 12 classes of alternative splicing events:**

- (1) TSS: Alternative 5' first exon (transcription start site)
- (2) TTS: Alternative 3' last exon (transcription terminal site)
- (3) SKIP: Skipped exon (SKIP\_ON,SKIP\_OFF pair)
- (4) XSKIP: Approximate SKIP (XSKIP\_ON,XSKIP\_OFF pair)
- (5) MSKIP: Multi-exon SKIP (MSKIP\_ON,MSKIP\_OFF pair)
- (6) XMSKIP: Approximate MSKIP (XMSKIP\_ON,XMSKIP\_OFF pair)
- (7) IR: Intron retention (IR\_ON, IR\_OFF pair)
- (8) XIR: Approximate IR (XIR\_ON, XIR\_OFF pair)
- (9) MIR: Multi-IR (MIR\_ON, MIR\_OFF pair)
- (10) XMIR: Approximate MIR (XMIR\_ON, XMIR\_OFF pair)
- (11) AE: Alternative exon ends (5', 3', or both)
- (12) XAE: Approximate AE
